# Supplementary material for: WNT-activated bone grafts repair osteonecrotic lesions in aged animals
Source: PubMed Central journal article supplement (PMC5660190; doi:10.1038/s41598-017-14395-9), 2017-10-27
Supplement: 41598_2017_14395_MOESM1_ESM.pdf [file 41598_2017_14395_MOESM1_ESM.pdf]

# WNT-activated bone grafts repair osteonecrotic lesions in aged animals

---

Salmon B<sup>1,2</sup>, Liu B<sup>1</sup>, Shen E<sup>1</sup>, Chen T<sup>1,3</sup>, Li J<sup>1,3</sup>, Gillette M<sup>1</sup>, Ransom RC<sup>1</sup>, Ezran M<sup>1</sup>, Johnson CA<sup>1,4</sup>, Castillo AB<sup>5</sup>,  
Shen WJ<sup>6</sup>, Kraemer FB<sup>6</sup>, Smith AA<sup>1</sup>, Helms JA\*<sup>1</sup>

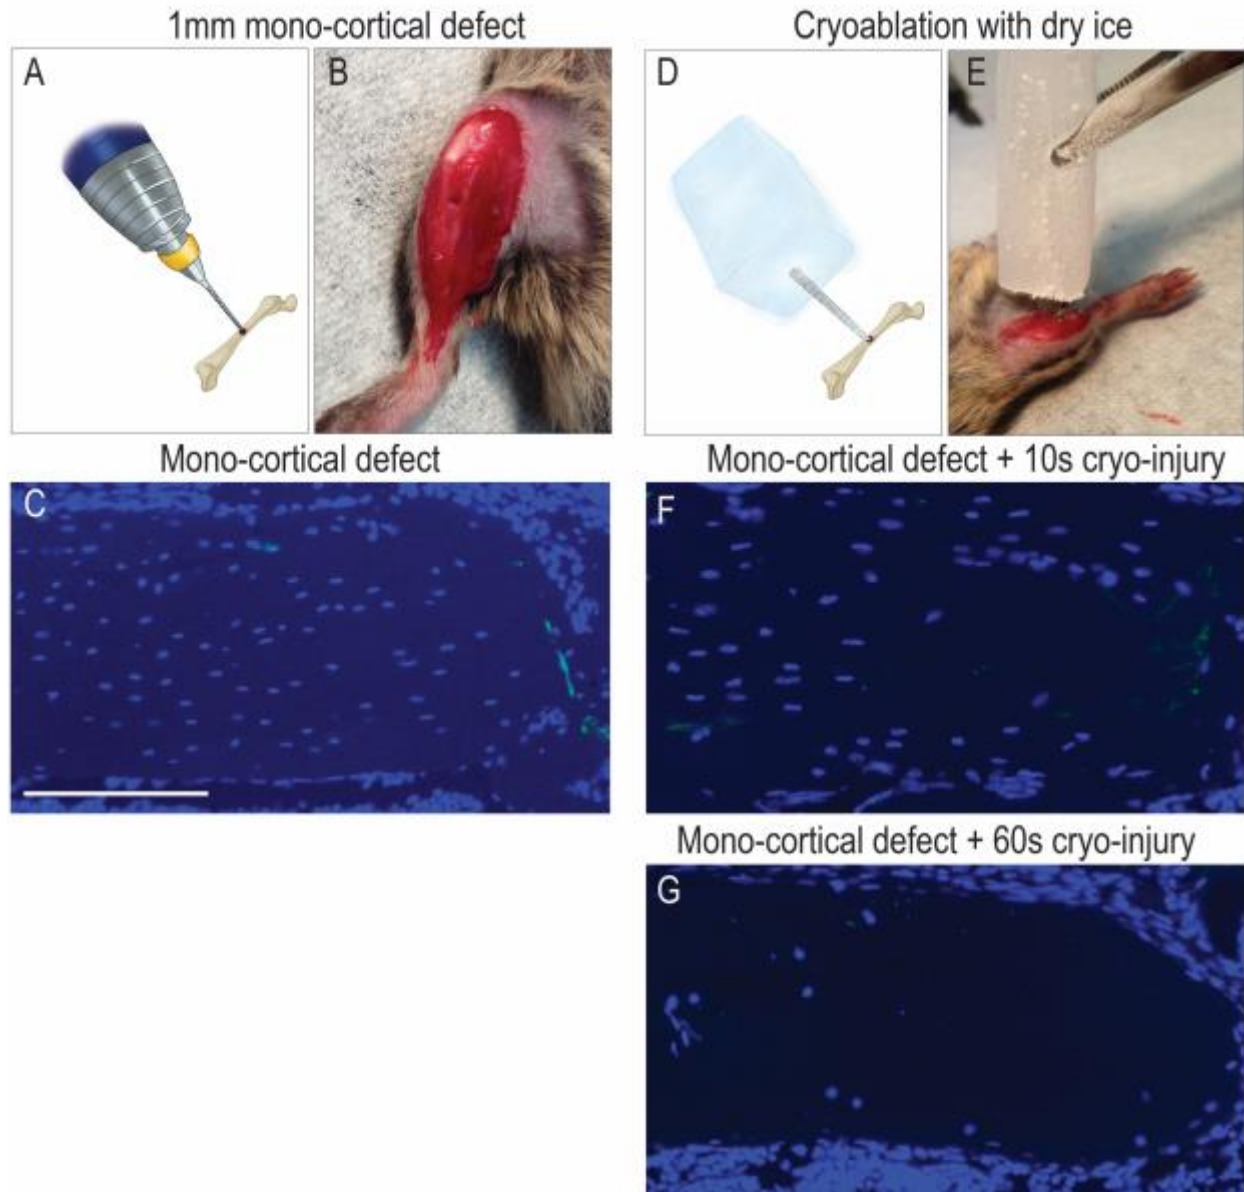

*Supplemental Figure 1. Schematic of the osteonecrotic mouse model and confirmation of cell death by cryoablation.*

(A,B) To expose the bone marrow space, a mono-cortical defect is performed in either the femur or tibia using a calibrated 1.0mm diameter drill. (C) DAPI staining focusing on the cortical edge of the defects, reveals the distribution of viable osteocytes. (D,E) To create necrosis of the bone a 1.0mm diameter drill is used as a cryo-probe to conduct the low-temperature from the dry ice to the defect. DAPI staining shows remaining viable osteocyte nuclei inside the cortical edge after (F) 10sec and (G) 60sec of cryoablation. Scale bars, 100 $\mu$ m; same magnification was applied in panels C,F,G.

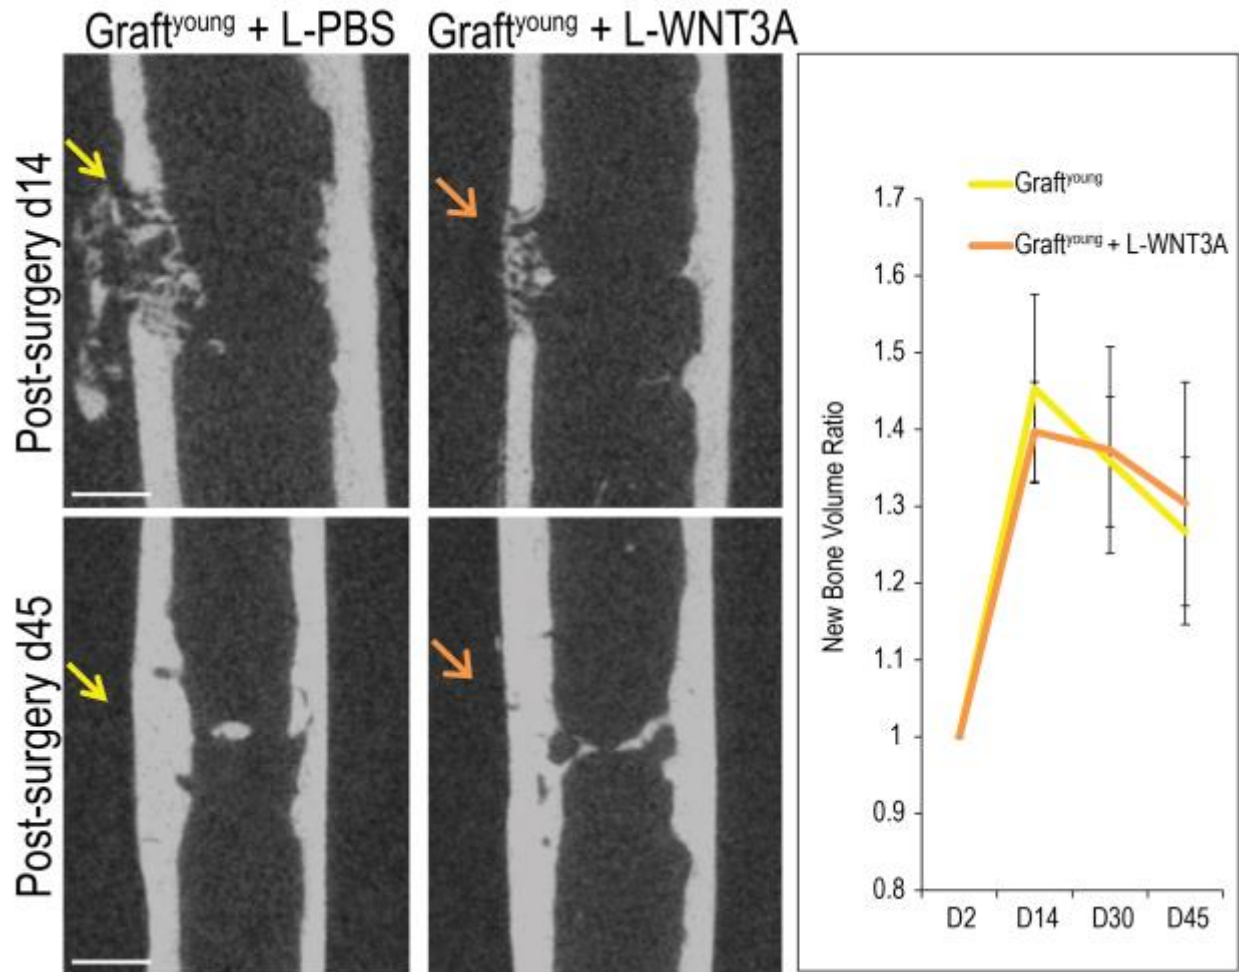

*Supplemental Figure 2. Graft<sup>young</sup> and graft<sup>young</sup> + L-WNT3A perform equivalently in healing osteonecrotic defects.*

Micro-CT image quantification from post surgery days 14 and 45 show similar extents of healing between those animals receiving graft<sup>young</sup> + L-PBS and those treated with graft<sup>young</sup> + L-WNT3A. Scale bars, 0.5mm; same magnification was applied in all panels.

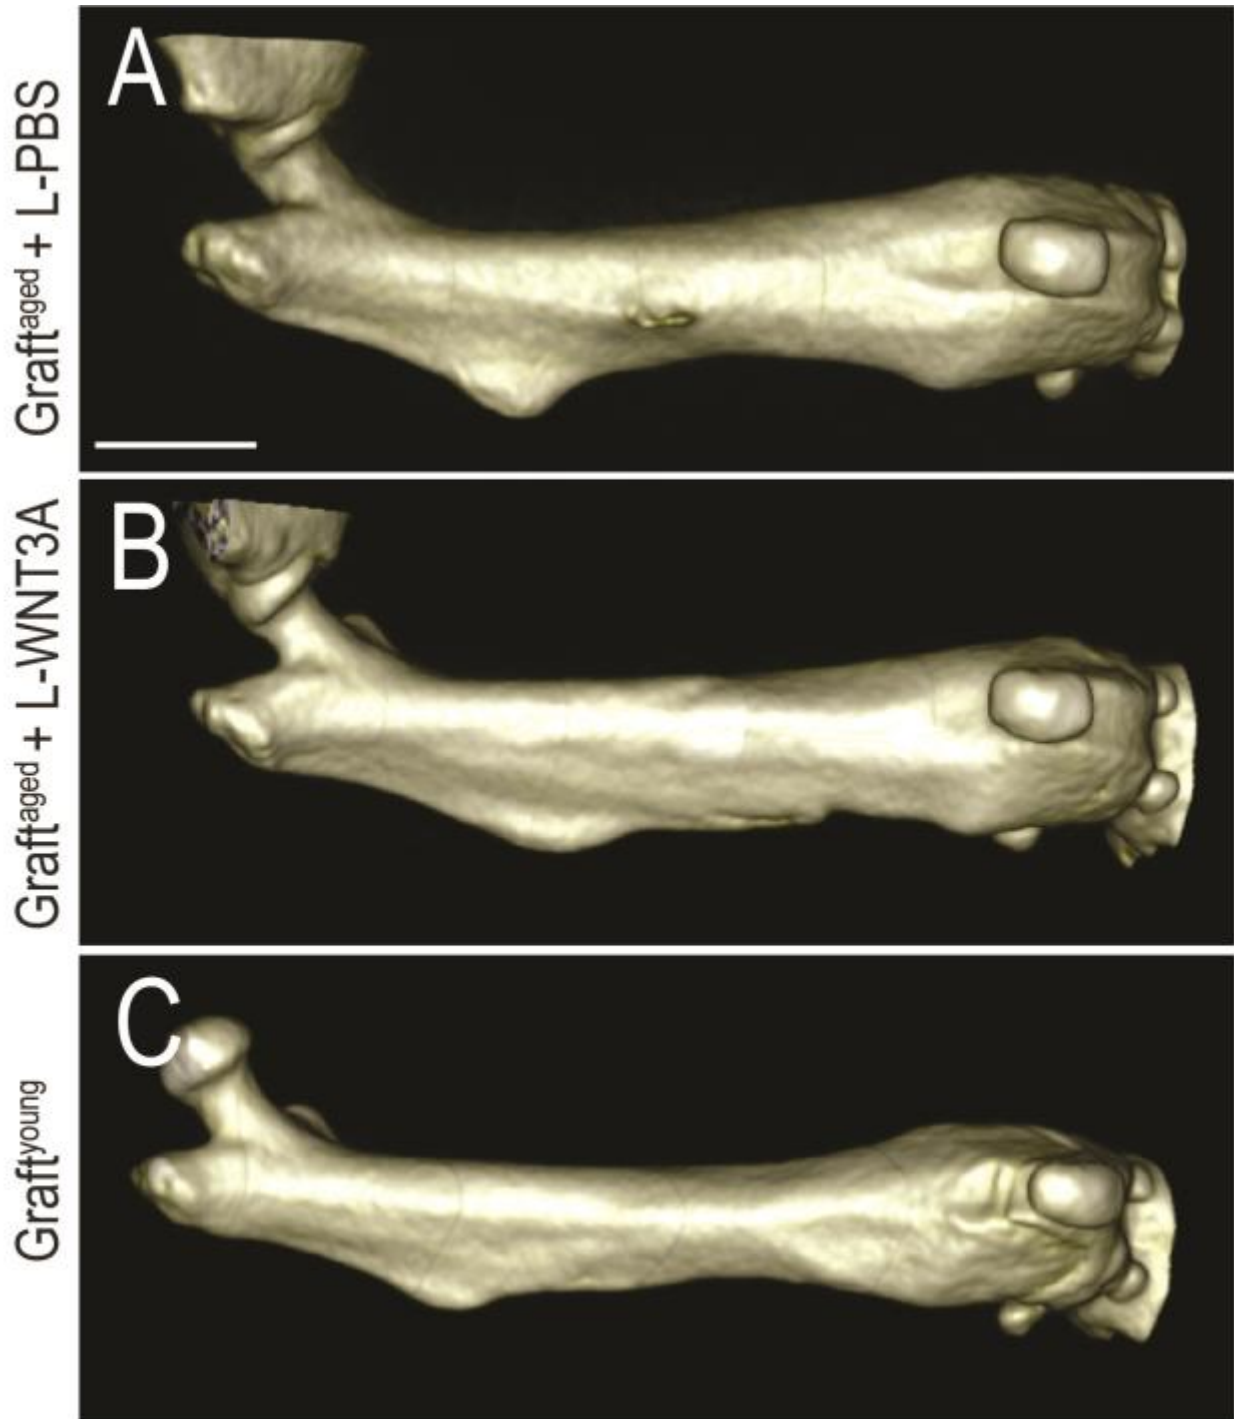

*Supplemental Figure 3. Bone grafting results in healing of osteonecrotic defects.*

On post-surgery day 30 surface rendering showed nearly detectable concavities associated with the osteonecrotic defects, although slight surface irregularities were detected in animals treated with

graft<sup>aged</sup>. No ectopic bone was detected in any treatment group ( $N \geq 4$  for each condition). (A) graft<sup>aged</sup> + L-PBS, (B) graft<sup>aged</sup> + L-WNT3A and (C) graft<sup>young</sup>. Scale bars, 2mm; same magnification was applied in panels A-C.
